# Supplementary material for: Molecular Characterization of Portuguese Patients with Hereditary Cerebellar Ataxia
Source: MDPI journal article supplement (doi:10.3390/cells11060981), 2022-03-12
Supplement: s1 [file s1]

Supplementary figure S1

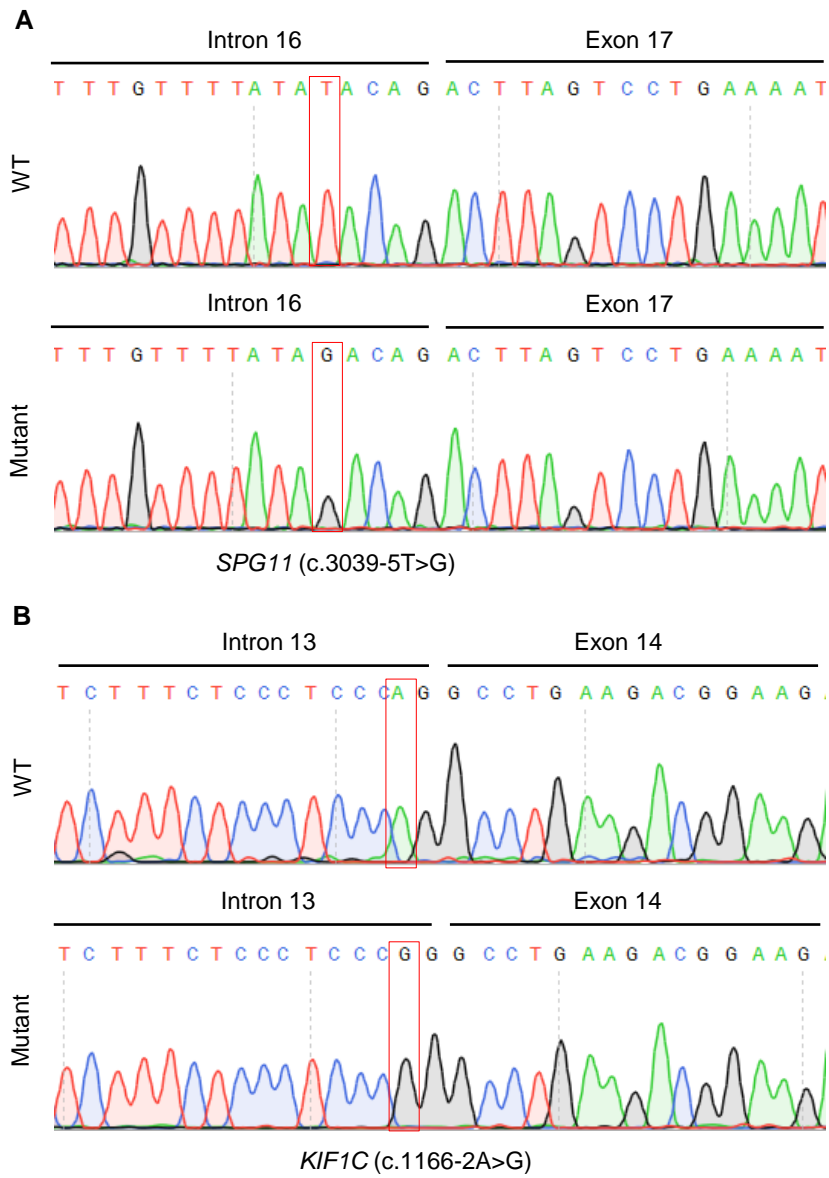

**Supplementary figure S1.** Electropherogram with the position of the *SPG11* (c.3039-5T>G) **(A)** and *KIF1C* (c.1166-2A>G) **(B)** splice-site variants boxed.
