# Supplementary material for: Molecular Characterization of Portuguese Patients with Hereditary Cerebellar Ataxia
Source: MDPI journal article supplement (doi:10.3390/cells11060981), 2022-03-12
Supplement: s1 [file s1]

**Table S5.** RNA and protein expression data obtained from the Human Protein Atlas for genes and respective proteins identified in this study.

| Genes          | RNA levels     |        |            |             | Protein levels          |                           |
|----------------|----------------|--------|------------|-------------|-------------------------|---------------------------|
|                | Brain enriched | Cortex | Cerebellum | Spinal cord | Cortical neuronal cells | Cerebellar Purkinje cells |
| <i>KIF1A</i>   | Yes            | 109.0  | 18.5       | 20.2        | -                       | -                         |
| <i>POLG</i>    | No             | 6.0    | 4.5        | 5.8         | Low                     | High                      |
| <i>SETX</i>    | No             | 6.8    | 9.8        | 8.1         | Medium                  | Medium                    |
| <i>PNKP</i>    | No             | 16.4   | 11.0       | 10.5        | High                    | Medium                    |
| <i>ANO10</i>   | No             | 21.0   | 23.8       | 20.0        | High                    | Medium                    |
| <i>CACNA1A</i> | Yes            | 25.7   | 91.8       | 6.7         | High                    | ND                        |
| <i>SACS</i>    | No             | 17.2   | 8.8        | 4.1         | Medium                  | Medium                    |
| <i>SPG11</i>   | No             | 21.4   | 23.3       | 18.8        | Medium                  | Low                       |
| <i>KIF1C</i>   | Yes            | 211.6  | 203.0      | 225.5       | Low                     | Medium                    |
| <i>SYNE1</i>   | Yes            | 72.3   | 150.2      | 40.6        | High                    | High                      |
| <i>HEXB</i>    | No             | 32.8   | 23.3       | 25.3        | ND                      | ND                        |
| <i>ATP1A3</i>  | Yes            | 634.7  | 84.4       | 10          | ND                      | ND                        |
| <i>FA2H</i>    | Yes            | 61.7   | 67.1       | 75.5        | ND                      | ND                        |

Data was obtained from the The Human Protein Atlas [1]. The RNA values are expressed as the normalized transcripts per Kb million (nTPM) expression levels from the consensus dataset (combines the HPA and GTEx transcriptomics datasets using the internal normalization pipeline). Protein levels are qualitative, achieved by evaluation of antibody staining, RNA-seq data, and annotated protein expression data. ND, not detected.

## Reference

1. Uhlen, M.; Fagerberg, L.; Hallstrom, B.M.; Lindskog, C.; Oksvold, P.; Mardinoglu, A.; Sivertsson, A.; Kampf, C.; Sjostedt, E.; Asplund, A.; et al. Proteomics. Tissue-based map of the human proteome. *Science* **2015**, *347*, 1260419, doi:10.1126/science.1260419.
