# Supplementary material for: Molecular Characterization of Portuguese Patients with Hereditary Cerebellar Ataxia
Source: MDPI journal article supplement (doi:10.3390/cells11060981), 2022-03-12
Supplement: s1 [file s1]

**Table S2.** Molecular functions and disease mechanisms associated with recessive cerebellar ataxia genes and encoded proteins, grouped by main clinical phenotype.

| Gene                                        | Protein                               | Subcellular localization      | Molecular function(s)                                                                                              | Associated disease(s)            | Disease mechanim(s)                                                                                                                                                              | References |
|---------------------------------------------|---------------------------------------|-------------------------------|--------------------------------------------------------------------------------------------------------------------|----------------------------------|----------------------------------------------------------------------------------------------------------------------------------------------------------------------------------|------------|
| <b>Spastic ataxia</b>                       |                                       |                               |                                                                                                                    |                                  |                                                                                                                                                                                  |            |
| <i>SACS</i>                                 | Sacsin                                | Cytoplasm;<br>Mitochondria    | Co-chaperone of Hsp70 chaperone machinery; regulator of mitochondria dynamics; maintenance of cytoskeleton network | ARSACS                           | Loss-of-function: reduced chaperone activity, and altered mitochondria and neurofilament networks caused by sacsin depletion                                                     | [1-4]      |
| <i>KIF1C</i>                                | Kinesin family member 1C (KIF1C)      | Cytoskeleton/<br>microtubules | Anterograde movement of vesicles; retrograde transport from Golgi to ER                                            | SPAX2;<br>SPG58                  | Loss-of-function / gain-of-function? (functional studies are needed for confirmation)                                                                                            | [5-7]      |
| <i>ANO10</i>                                | Anoctamin-10 (ANO10)                  | Plasma membrane               | Regulates intracellular calcium signals                                                                            | SCAR10/<br>ARCA3                 | Loss-of-function? (functional studies are needed for confirmation)                                                                                                               | [8,9]      |
| <i>SPG11</i>                                | Spatacsin                             | Cytoplasm;<br>ER;<br>Vesicles | Role in neuronal axonal growth, intracellular cargo trafficking and lysosome function                              | SPG11;<br>ALS5;<br>CMTD          | Loss-of-function: impaired axonal transport and neurite outgrowth, and endolysosomal abnormalities due to spatacsin dysfunction                                                  | [10-14]    |
| <i>SYNE1</i>                                | SYNE1/Nesprin-1                       | Nuclear envelope              | Structural protein that links the nuclear envelope to the actin cytoskeleton (LINC complex)                        | ARCA1/<br>SCAR8;<br>AMC;<br>EDMD | Loss-of-function: nuclear morphology defects and defective synaptic transmission caused by nesprin-1 insufficiency                                                               | [15-18]    |
| <b>Ataxia and neuropathy</b>                |                                       |                               |                                                                                                                    |                                  |                                                                                                                                                                                  |            |
| <i>POLG</i>                                 | DNA polymerase subunit gamma 1 (POLG) | Mitochondria                  | Involved in the replication of mtDNA and mtDNA repair                                                              | SANDO;<br>SCAE;<br>MDS;<br>PEO   | Loss-of-function: reduced POLG DNA polymerase activity and DNA-binding                                                                                                           | [19-24]    |
| <b>Ataxia with oculomotor apraxia (AOA)</b> |                                       |                               |                                                                                                                    |                                  |                                                                                                                                                                                  |            |
| <i>SETX</i>                                 | Senataxin                             | Nucleus;<br>Cytoplasm         | Probable RNA/DNA helicase involved in transcription regulation, mRNA splicing and DNA damage response              | AOA2;<br>ALS4                    | Loss-of-function: altered gene expression and mRNA processing caused by senataxin disrupted function;<br>Toxic gain-of-function: increased susceptibility to DNA-damaging agents | [25-28]    |

| Gene                                    | Protein                                     | Subcellular localization | Molecular function(s)                                                                  | Associated disease(s) | Disease mechanism(s)                                                                     | References |
|-----------------------------------------|---------------------------------------------|--------------------------|----------------------------------------------------------------------------------------|-----------------------|------------------------------------------------------------------------------------------|------------|
| <i>PNKP</i>                             | Polynucleotide kinase 3' phosphatase (PNKP) | Nucleus                  | Involved in DNA damage repair and cell cycle regulation                                | AOA4; MCSZ; CMTD      | Loss-of-function: impaired DNA repair and cell cycle dynamics caused by hypomorphic PNKP | [29-32]    |
| <b>Ataxia and dystonia</b>              |                                             |                          |                                                                                        |                       |                                                                                          |            |
| <i>HEXB</i>                             | Hexosaminidase subunit beta (HEXB)          | Lysosome                 | Catalyzes the degradation of the GM2 ganglioside, and other molecules, in the lysosome | Sandhoff disease      | Loss-of-function: accumulation of GM2 gangliosides and lysosomal abnormalities           | [33,34]    |
| <b>Ataxia with cognitive impairment</b> |                                             |                          |                                                                                        |                       |                                                                                          |            |
| <i>FA2H</i>                             | Fatty acid 2-hydroxylase (FA2H)             | ER membrane              | Catalyzes the synthesis of 2-hydroxysphingolipids (myelin lipids)                      | SPG35                 | Loss-of-function: decreased hydroxylation of myelin lipid components                     | [35,36]    |

AMC3, arthrogryposis multiplex congenita; ALS, amyotrophic lateral sclerosis; AOA, ataxia and oculomotor apraxia; ARSACS, autosomal recessive spastic ataxia of Charlevoix-Saguenay; CMTD, Charcot-Marie-Tooth disease; EA, episodic ataxia; EDMD, Emery-Dreifuss muscular dystrophy; ER, endoplasmic reticulum; LINC, linker of nucleoskeleton and cytoskeleton; MCSZ, microcephaly, seizures, and developmental delay; MIRAS, mitochondrial recessive ataxia syndrome; MDS, mitochondrial DNA depletion syndrome; mtDNA, mitochondrial DNA; OA, oculomotor apraxia; SANDO, sensory ataxic neuropathy with dysarthria and ophthalmoparesis; SCAE, spinocerebellar ataxia with epilepsy; SPG, spastic paraplegia; PEO, progressive external ophthalmoplegia; WT, wild-type.

## References

- Girard, M.; Lariviere, R.; Parfitt, D.A.; Deane, E.C.; Gaudet, R.; Nossova, N.; Blondeau, F.; Prenosil, G.; Vermeulen, E.G.; Duchon, M.R.; et al. Mitochondrial dysfunction and Purkinje cell loss in autosomal recessive spastic ataxia of Charlevoix-Saguenay (ARSACS). *Proc Natl Acad Sci U S A* **2012**, *109*, 1661-1666, doi:10.1073/pnas.1113166109.
- Lariviere, R.; Gaudet, R.; Gentil, B.J.; Girard, M.; Conte, T.C.; Minotti, S.; Leclerc-Desaulniers, K.; Gehring, K.; McKinney, R.A.; Shoubbridge, E.A.; et al. Sacs knockout mice present pathophysiological defects underlying autosomal recessive spastic ataxia of Charlevoix-Saguenay. *Hum Mol Genet* **2015**, *24*, 727-739, doi:10.1093/hmg/ddu491.
- Parfitt, D.A.; Michael, G.J.; Vermeulen, E.G.; Prodromou, N.V.; Webb, T.R.; Gallo, J.M.; Cheetham, M.E.; Nicoll, W.S.; Blatch, G.L.; Chapple, J.P. The ataxia protein sacs is a functional co-chaperone that protects against polyglutamine-expanded ataxin-1. *Hum Mol Genet* **2009**, *18*, 1556-1565, doi:10.1093/hmg/ddp067.
- Engert, J.C.; Berube, P.; Mercier, J.; Dore, C.; Lepage, P.; Ge, B.; Bouchard, J.P.; Mathieu, J.; Melancon, S.B.; Schalling, M.; et al. ARSACS, a spastic ataxia common in northeastern Quebec, is caused by mutations in a new gene encoding an 11.5-kb ORF. *Nat Genet* **2000**, *24*, 120-125, doi:10.1038/72769.
- Gabrych, D.R.; Lau, V.Z.; Niwa, S.; Silverman, M.A. Going Too Far Is the Same as Falling Short(dagger): Kinesin-3 Family Members in Hereditary Spastic Paraplegia. *Front Cell Neurosci* **2019**, *13*, 419, doi:10.3389/fncel.2019.00419.

6. Dor, T.; Cinnamon, Y.; Raymond, L.; Shaag, A.; Bouslam, N.; Bouhouche, A.; Gaussen, M.; Meyer, V.; Durr, A.; Brice, A.; et al. KIF1C mutations in two families with hereditary spastic paraparesis and cerebellar dysfunction. *J Med Genet* **2014**, *51*, 137-142, doi:10.1136/jmedgenet-2013-102012.
7. Alfares, A.; Alfadhel, M.; Wani, T.; Alsahli, S.; Alluhaydan, I.; Al Mutairi, F.; Alothaim, A.; Albalwi, M.; Al Subaie, L.; Alturki, S.; et al. A multicenter clinical exome study in unselected cohorts from a consanguineous population of Saudi Arabia demonstrated a high diagnostic yield. *Mol Genet Metab* **2017**, *121*, 91-95, doi:10.1016/j.ymgme.2017.04.002.
8. Balreira, A.; Boczonadi, V.; Barca, E.; Pyle, A.; Bansagi, B.; Appleton, M.; Graham, C.; Hargreaves, I.P.; Rasic, V.M.; Lochmuller, H.; et al. ANO10 mutations cause ataxia and coenzyme Q(1)(0) deficiency. *J Neurol* **2014**, *261*, 2192-2198, doi:10.1007/s00415-014-7476-7.
9. Vermeer, S.; Hoischen, A.; Meijer, R.P.; Gilissen, C.; Neveling, K.; Wieskamp, N.; de Brouwer, A.; Koenig, M.; Anheim, M.; Assoum, M.; et al. Targeted next-generation sequencing of a 12.5 Mb homozygous region reveals ANO10 mutations in patients with autosomal-recessive cerebellar ataxia. *Am J Hum Genet* **2010**, *87*, 813-819, doi:10.1016/j.ajhg.2010.10.015.
10. Perez-Branguli, F.; Mishra, H.K.; Prots, I.; Havlicek, S.; Kohl, Z.; Saul, D.; Rummel, C.; Dorca-Arevalo, J.; Regensburger, M.; Graef, D.; et al. Dysfunction of spatacsin leads to axonal pathology in SPG11-linked hereditary spastic paraplegia. *Hum Mol Genet* **2014**, *23*, 4859-4874, doi:10.1093/hmg/ddu200.
11. Renvoise, B.; Chang, J.; Singh, R.; Yonekawa, S.; FitzGibbon, E.J.; Mankodi, A.; Vanderver, A.; Schindler, A.; Toro, C.; Gahl, W.A.; et al. Lysosomal abnormalities in hereditary spastic paraplegia types SPG15 and SPG11. *Ann Clin Transl Neurol* **2014**, *1*, 379-389, doi:10.1002/acn3.64.
12. Stevanin, G.; Azzedine, H.; Denora, P.; Boukhris, A.; Tazir, M.; Lossos, A.; Rosa, A.L.; Lerer, I.; Hamri, A.; Alegria, P.; et al. Mutations in SPG11 are frequent in autosomal recessive spastic paraplegia with thin corpus callosum, cognitive decline and lower motor neuron degeneration. *Brain* **2008**, *131*, 772-784, doi:10.1093/brain/awm293.
13. Orlacchio, A.; Babalini, C.; Borreca, A.; Patrono, C.; Massa, R.; Basaran, S.; Munhoz, R.P.; Rogaeva, E.A.; St George-Hyslop, P.H.; Bernardi, G.; et al. SPATAC SIN mutations cause autosomal recessive juvenile amyotrophic lateral sclerosis. *Brain* **2010**, *133*, 591-598, doi:10.1093/brain/awp325.
14. Montecchiani, C.; Pedace, L.; Lo Giudice, T.; Casella, A.; Mearini, M.; Gaudiello, F.; Pedroso, J.L.; Terracciano, C.; Caltagirone, C.; Massa, R.; et al. ALS5/SPG11/KIAA1840 mutations cause autosomal recessive axonal Charcot-Marie-Tooth disease. *Brain* **2016**, *139*, 73-85, doi:10.1093/brain/awv320.
15. Synofzik, M.; Smets, K.; Mallaret, M.; Di Bella, D.; Gallenmuller, C.; Baets, J.; Schulze, M.; Magri, S.; Sarto, E.; Mustafa, M.; et al. SYNE1 ataxia is a common recessive ataxia with major non-cerebellar features: a large multi-centre study. *Brain* **2016**, *139*, 1378-1393, doi:10.1093/brain/aww079.
16. Zhang, Q.; Bethmann, C.; Worth, N.F.; Davies, J.D.; Wasner, C.; Feuer, A.; Ragnauth, C.D.; Yi, Q.; Mellad, J.A.; Warren, D.T.; et al. Nesprin-1 and -2 are involved in the pathogenesis of Emery Dreifuss muscular dystrophy and are critical for nuclear envelope integrity. *Hum Mol Genet* **2007**, *16*, 2816-2833, doi:10.1093/hmg/ddm238.
17. Gros-Louis, F.; Dupre, N.; Dion, P.; Fox, M.A.; Laurent, S.; Verreault, S.; Sanes, J.R.; Bouchard, J.P.; Rouleau, G.A. Mutations in SYNE1 lead to a newly discovered form of autosomal recessive cerebellar ataxia. *Nat Genet* **2007**, *39*, 80-85, doi:10.1038/ng1927.
18. Razafsky, D.; Hodzic, D. A variant of Nesprin1 giant devoid of KASH domain underlies the molecular etiology of autosomal recessive cerebellar ataxia type I. *Neurobiol Dis* **2015**, *78*, 57-67, doi:10.1016/j.nbd.2015.03.027.

19. Luoma, P.T.; Luo, N.; Loscher, W.N.; Farr, C.L.; Horvath, R.; Wanschitz, J.; Kiechl, S.; Kaguni, L.S.; Suomalainen, A. Functional defects due to spacer-region mutations of human mitochondrial DNA polymerase in a family with an ataxia-myopathy syndrome. *Hum Mol Genet* **2005**, *14*, 1907-1920, doi:10.1093/hmg/ddi196.
20. Schaller, A.; Hahn, D.; Jackson, C.B.; Kern, I.; Chardot, C.; Belli, D.C.; Gallati, S.; Nuoffer, J.M. Molecular and biochemical characterisation of a novel mutation in POLG associated with Alpers syndrome. *BMC Neurol* **2011**, *11*, 4, doi:10.1186/1471-2377-11-4.
21. Van Goethem, G.; Dermaut, B.; Lofgren, A.; Martin, J.J.; Van Broeckhoven, C. Mutation of POLG is associated with progressive external ophthalmoplegia characterized by mtDNA deletions. *Nat Genet* **2001**, *28*, 211-212, doi:10.1038/90034.
22. Naviaux, R.K.; Nguyen, K.V. POLG mutations associated with Alpers' syndrome and mitochondrial DNA depletion. *Ann Neurol* **2004**, *55*, 706-712, doi:10.1002/ana.20079.
23. Winterthun, S.; Ferrari, G.; He, L.; Taylor, R.W.; Zeviani, M.; Turnbull, D.M.; Engelsen, B.A.; Moen, G.; Bindoff, L.A. Autosomal recessive mitochondrial ataxic syndrome due to mitochondrial polymerase gamma mutations. *Neurology* **2005**, *64*, 1204-1208, doi:10.1212/01.WNL.0000156516.77696.5A.
24. Vissing, J.; Ravn, K.; Danielsen, E.R.; Duno, M.; Wibrand, F.; Wevers, R.A.; Schwartz, M. Multiple mtDNA deletions with features of MNGIE. *Neurology* **2002**, *59*, 926-929, doi:10.1212/wnl.59.6.926.
25. Airolidi, G.; Guidarelli, A.; Cantoni, O.; Panzeri, C.; Vantaggiato, C.; Bonato, S.; Grazia D'Angelo, M.; Falcone, S.; De Palma, C.; Tonelli, A.; et al. Characterization of two novel SETX mutations in AOA2 patients reveals aspects of the pathophysiological role of senataxin. *Neurogenetics* **2010**, *11*, 91-100, doi:10.1007/s10048-009-0206-0.
26. Fogel, B.L.; Cho, E.; Wahnich, A.; Gao, F.; Becherel, O.J.; Wang, X.; Fike, F.; Chen, L.; Criscuolo, C.; De Michele, G.; et al. Mutation of senataxin alters disease-specific transcriptional networks in patients with ataxia with oculomotor apraxia type 2. *Hum Mol Genet* **2014**, *23*, 4758-4769, doi:10.1093/hmg/ddu190.
27. Moreira, M.C.; Klur, S.; Watanabe, M.; Nemeth, A.H.; Le Ber, I.; Moniz, J.C.; Tranchant, C.; Aubourg, P.; Tazir, M.; Schols, L.; et al. Senataxin, the ortholog of a yeast RNA helicase, is mutant in ataxia-ocular apraxia 2. *Nat Genet* **2004**, *36*, 225-227, doi:10.1038/ng1303.
28. Chen, Y.Z.; Bennett, C.L.; Huynh, H.M.; Blair, I.P.; Puls, I.; Irobi, J.; Dierick, I.; Abel, A.; Kennerson, M.L.; Rabin, B.A.; et al. DNA/RNA helicase gene mutations in a form of juvenile amyotrophic lateral sclerosis (ALS4). *Am J Hum Genet* **2004**, *74*, 1128-1135, doi:10.1086/421054.
29. Bras, J.; Alonso, I.; Barbot, C.; Costa, M.M.; Darwent, L.; Orme, T.; Sequeiros, J.; Hardy, J.; Coutinho, P.; Guerreiro, R. Mutations in PNKP cause recessive ataxia with oculomotor apraxia type 4. *Am J Hum Genet* **2015**, *96*, 474-479, doi:10.1016/j.ajhg.2015.01.005.
30. Pedroso, J.L.; Rocha, C.R.; Macedo-Souza, L.I.; De Mario, V.; Marques, W., Jr.; Barsottini, O.G.; Bulle Oliveira, A.S.; Menck, C.F.; Kok, F. Mutation in PNKP presenting initially as axonal Charcot-Marie-Tooth disease. *Neurol Genet* **2015**, *1*, e30, doi:10.1212/NXG.0000000000000030.
31. Reynolds, J.J.; Walker, A.K.; Gilmore, E.C.; Walsh, C.A.; Caldecott, K.W. Impact of PNKP mutations associated with microcephaly, seizures and developmental delay on enzyme activity and DNA strand break repair. *Nucleic Acids Res* **2012**, *40*, 6608-6619, doi:10.1093/nar/gks318.
32. Shen, J.; Gilmore, E.C.; Marshall, C.A.; Haddadin, M.; Reynolds, J.J.; Eyaid, W.; Bodell, A.; Barry, B.; Gleason, D.; Allen, K.; et al. Mutations in PNKP cause microcephaly, seizures and defects in DNA repair. *Nat Genet* **2010**, *42*, 245-249, doi:10.1038/ng.526.

33. Bolhuis, P.A.; Oonk, J.G.; Kamp, P.E.; Ris, A.J.; Michalski, J.C.; Overdijk, B.; Reuser, A.J. Ganglioside storage, hexosaminidase lability, and urinary oligosaccharides in adult Sandhoff's disease. *Neurology* **1987**, *37*, 75-81, doi:10.1212/wnl.37.1.75.
34. Redonnet-Vernhet, I.; Mahuran, D.J.; Salvayre, R.; Dubas, F.; Levade, T. Significance of two point mutations present in each HEXB allele of patients with adult GM2 gangliosidosis (Sandhoff disease) homozygosity for the Ile207-->Val substitution is not associated with a clinical or biochemical phenotype. *Biochim Biophys Acta* **1996**, *1317*, 127-133, doi:10.1016/s0925-4439(96)00044-0.
35. Dick, K.J.; Eckhardt, M.; Paisan-Ruiz, C.; Alshehhi, A.A.; Proukakis, C.; Sibtain, N.A.; Maier, H.; Sharifi, R.; Patton, M.A.; Bashir, W.; et al. Mutation of FA2H underlies a complicated form of hereditary spastic paraplegia (SPG35). *Hum Mutat* **2010**, *31*, E1251-1260, doi:10.1002/humu.21205.
36. Edvardson, S.; Hama, H.; Shaag, A.; Gomori, J.M.; Berger, I.; Soffer, D.; Korman, S.H.; Taustein, I.; Saada, A.; Elpeleg, O. Mutations in the fatty acid 2-hydroxylase gene are associated with leukodystrophy with spastic paraparesis and dystonia. *Am J Hum Genet* **2008**, *83*, 643-648, doi:10.1016/j.ajhg.2008.10.010.
