# Supplementary material for: Molecular Characterization of Portuguese Patients with Hereditary Cerebellar Ataxia
Source: MDPI journal article supplement (doi:10.3390/cells11060981), 2022-03-12
Supplement: s1 [file s1]

**Table S4.** Protein domain location of variants identified.

| Gene    | cDNA            | Protein           | Protein domain                                   |
|---------|-----------------|-------------------|--------------------------------------------------|
| SACS    | c.8148del       | p.Pro2717Glnfs*22 | Sacsin-repeating region with homology with Hsp90 |
|         | c.1373C>T       | p.Thr458Ile       | Sacsin-repeating region with homology with Hsp90 |
|         | c. 5440_5449del | Glu1814Argfs*14   | Sacsin-repeating region with homology with Hsp90 |
|         | c.3066del       | Asn1025Metfs*10   | Non-specific domain                              |
|         | c.2656_2666del  | Gln886*           | Non-specific domain                              |
|         | c.814C>T        | p.Arg272Cys       | Sacsin-repeating region with homology with Hsp90 |
| KIF1C   | c.393_396del    | Ser131Argfs*13    | Motor domain                                     |
|         | c.1166-2A>G     | p.Gly389Aspfs*29  | Coiled-coil domain                               |
| AN010   | c.132dup        | p.Asp45Argfs*9    | Non-specific domain                              |
| SPG11   | c.1951C>T       | Arg651*           | Non-specific domain                              |
|         | c.3039-5T>G     | Leu1014Glnfs*3    | Non-specific domain                              |
| SYNE1   | c.17270C>G      | p.Thr5757Arg      | Spectrin repeat domain                           |
| CACNA1A | c.4996C>G       | p.Arg1666Gly      | Transmembrane domain                             |
| KIF1A   | c.761G>A        | p.Arg254Gln       | Kinesin motor domain                             |
| POLG    | c.2243G>C       | p.Trp748Ser       | RNA-directed RNA polymerase, C-terminal domain   |
| SETX    | c.6139G>T       | p.Gly2047Cys      | DNA2/NAM7 helicase domain                        |
| PNKP    | c.1123G>T       | Gly375Trp         | Kinase domain                                    |
|         | c.1253_1269dup  | Thr424Glyfs*49    | Kinase domain                                    |
|         | c.1123G>T       | p.Gly375Trp       | Kinase domain                                    |
|         | c.1221_1223del  | p.Thr408del       | Kinase domain                                    |
|         | c.1123G>T       | p.Gly375Trp       | Kinase domain                                    |
| HEXB    | c.1514G>A       | p.Arg505Gln       | Glycoside Hydrolase Catalytic Domain             |
| ATP1A3  | c.374T>A        | p.Val125Glu       | Transmembrane domain                             |
| FA2H    | c.619_620del    | p.Thr207Glyfs*105 | Non-specific domain                              |
