# Supplementary material for: Molecular Characterization of Portuguese Patients with Hereditary Cerebellar Ataxia
Source: Cells. 2022 Mar 12;11(6):981. doi: 10.3390/cells11060981 (PMC8946949; doi:10.3390/cells11060981)
Supplement: Supplementary file 1 [file cells-11-00981-s001.zip]

Archive with 6 entries (6 files):
- Figure1_supporting info.pdf
- Table_S1.xlsx
- Table_S2_revised.pdf
- Table_S3.xlsx
- Table_S4.pdf
- Table_S5.pdf
