# Supplementary material for: Molecular Characterization of Portuguese Patients with Hereditary Cerebellar Ataxia
Source: Cells. 2022 Mar 12;11(6):981. doi: 10.3390/cells11060981 (PMC8946949; doi:10.3390/cells11060981)
Supplement: Supplementary file 1 [file cells-11-00981-s001.zip › Table_S1.xlsx]

## Sheet: WES variants
Table S1: Pathogenic and likely pathogenic variants identified byWES
Family code	Main clinical phenotype	Gene	cDNA	Protein	Location	Zygozity	Acession number	Segregation tested	Reference
AR53	Spastic ataxia	SACS	c.8148del	p.Pro2717Glnfs*22	Ex10	Hom	NM_014363.6	No	This study
AR77	Spastic ataxia	SACS	c.1373C>T	p.Thr458Ile	Ex8	Hom	NM_014363.6	No	Romano (2013) Hum Mutat 34, 525
			c. 5440_5449del	Glu1814Argfs*14	Ex10	Hom			This study
AR120	Spastic ataxia	SACS	c.3066del	Asn1025Metfs*10	Ex10	Het	NM_014363.6	No	This study
			c.2656_2666del	Gln886*	Ex10	Het			This study
AR252	Spastic ataxia	SACS	c.814C>T	p.Arg272Cys	Ex8	Hom	NM_014363.6	No	Guernsey (2010) J Neurol Sci 288, 79
AR96	Spastic ataxia	KIF1C	c.393_396del	Ser131Argfs*13	Ex6	Hom	NM_006612.6	Yes	This study
AR111	Spastic ataxia	KIF1C	c.1166-2A>G	p.Gly389Aspfs*29	In13	Hom	NM_006612.6	Yes	This study
AR103	Spastic ataxia	AN010	c.132dup	p.Asp45Argfs*9	Ex2	Hom	NM_018075.4	Yes	Renaud (2014) JAMA Neurol 71, 1305
AR108	Spastic ataxia	SPG11	c.1951C>T	Arg651*	Ex10	Het	NM_025137.4	Yes, only the mother	Hehr (2007) Ann Neurol 62, 656
			c.3039-5T>G	Leu1014Glnfs*3	In16	Het			This study
AR109	Spastic ataxia	SYNE1	c.17270C>G	p.Thr5757Arg	Ex91	Hom	NM_033071.3	No	Algahtani (2017) J Neurol Sci 372, 97
AR267	Spastic ataxia	CACNA1A	c.4996C>G	p.Arg1666Gly	Ex47	Het	NM_001127222.2	No	This study
AR4	Ataxia and neuropathy	SETX	c.6139G>T	p.Gly2047Cys	Ex16	Hom	NM_015046.7	No	Sawyer (2014) Hum Mutat 35, 45
AR49	Ataxia and neuropathy	KIF1A	c.761G>A	p.Arg254Gln	Ex8	Het	NM_001244008.2	Yes	Ohba (2015) J Hum Genet 60, 739
AR92	Ataxia and neuropathy	PNKP	c.1123G>T	p.Gly375Trp	Ex12	Hom	NM_007254.4	No	Bras (2015) Am J Hum Genet 96, 474
AR126	Ataxia and neuropathy	POLG	c.2243G>C	p.Trp748Ser	Ex13	Hom	NM002693.2	No	Van Goethem (2004) Neurology 63, 1251
AR86	AOA	PNKP	c.1123G>T	Gly375Trp	Ex12	Het	NM_007254.3	Yes	Bras (2015) Am J Hum Genet 96, 474
			c.1253_1269dup	Thr424Glyfs*49	Ex14	Het			Bras (2015) Am J Hum Genet 96, 474
AR117	AOA	PNKP	c.1221_1223del	p.Thr408del	Ex14	Het	NM_007254.3	No	Bras (2015) Am J Hum Genet 96, 474
			c.1123G>T	p.Gly375Trp	Ex12	Het			Bras (2015) Am J Hum Genet 96, 474
AR2	Ataxia and dystonia	HEXB	c.1514G>A	p.Arg505Gln	Ex13	Hom	NM_000521.4	Yes	Bolhuis (1993) Biochim Biophys Acta 1182, 142
AR278	Ataxia and dystonia	ATP1A3	c.374T>A	p.Val125Glu	Ex5	Het	NM_152296.5	No	This study
AR16	Ataxia with cognitive impairment	FA2H	c.619_620del	p.Thr207Glyfs*105	Ex5	Hom	NM_024306.5	No	This study
