# Supplementary material for: Molecular Characterization of Portuguese Patients with Hereditary Cerebellar Ataxia
Source: Cells. 2022 Mar 12;11(6):981. doi: 10.3390/cells11060981 (PMC8946949; doi:10.3390/cells11060981)
Supplement: Supplementary file 1 [file cells-11-00981-s001.zip › Table_S3.xlsx]

## Sheet: Splice_de novo_variants
Table S3. Pathogenic splice site variants and likely pathogenic missense variants, and pathogenicity predictions
Family	Chr	Genomic Position	Gene	cDNA	Protein	RefSNPs	Acession number	MAF	CADD_phred	SIFT	Mutation Taster	Polyphen2	Mutation assessor	FATHMM	UMD-Predictor	SSF	MaxEnt	NNSPLICE	GeneSplicer	HSF
AR108	15	44613541	SPG11	c.3039-5T>G	Leu1014Glnfs*3	rs763224175	NM_025137.4	0.008699%	-	-	-	-	-	-	-	Loss of acceptor splice site / new acceptor splice site	Loss of acceptor splice site / new acceptor splice site	Loss of acceptor splice site / new acceptor splice site	-	New acceptor splice site
AR111	17	4910208	KIF1C	c.1166-2A>G	p.Gly389Aspfs*29	-	NM_006612.6	-	-	-	-	-	-	-	-	Loss of acceptor splice site	Loss of acceptor splice site / new acceptor splice site	Loss of acceptor splice site	Loss of acceptor splice site / new acceptor splice site	Loss of acceptor splice site / new acceptor splice site
AR267	19	13346499	CACNA1A	c.4996C>G	p.Arg1666Gly	-	NM_001127222.2	-	24.3	Damaging	Disease causing	Probably damading	Medium	Damaging	Pathogenic
AR278	19	42490365	ATP1A3	c.374T>A	p.Val125Glu	-	NM_152296.5	-	27.9	Damaging	Polymorphism	Probably damading	Medium	Damaging	Pathogenic
The genomic position is relative to human genome assembly GRCh37 (hg19). Chr, chromosome; MAF, minor allele frequency (gnomAD; relative to Latino/Admixed American; no alleles were counted in Non-Finnish European.
